# Supplementary material for: Cross-species recognition of SARS-CoV-2 to bat ACE2
Source: PubMed Central journal article supplement (PMC7817217; doi:10.1073/pnas.2020216118), 2020-12-28
Supplement: pnas.2020216118.sapp.pdf [file pnas.2020216118.sapp.pdf]

**SI Appendix Figures and Tables:**

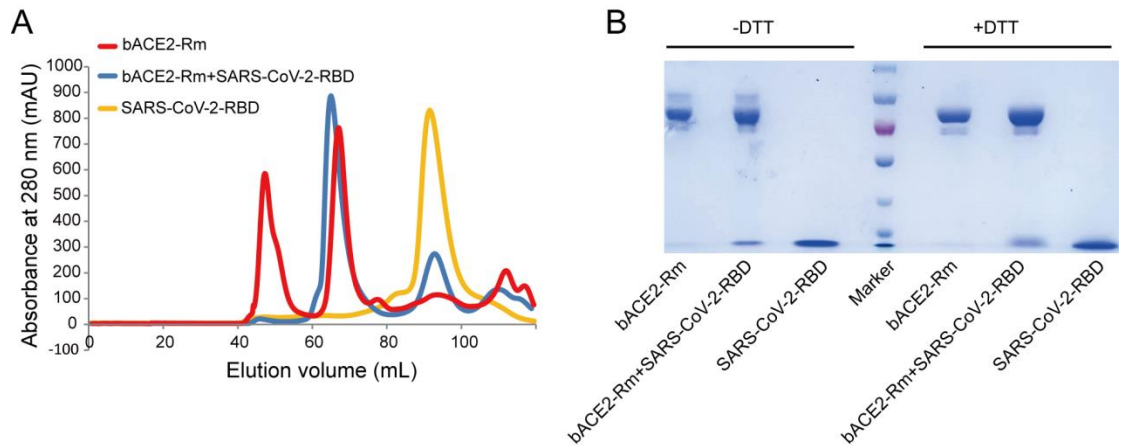

**SI Appendix, Fig. S1. Gel filtration profile of SARS-COV-2-RBD/bACE2-Rm complex protein.** (A) Gel filtration profiles of bACE2-Rm (red), SARS-COV-2-RBD (yellow) and the bACE2-Rm and SARS-COV-2-RBD complex (blue) were analyzed by size-exclusion chromatography as indicated. (B) The separation profiles of each pooled samples on SDS-PAGE are shown in reducing (+DTT) or non-reducing (-DTT) conditions.

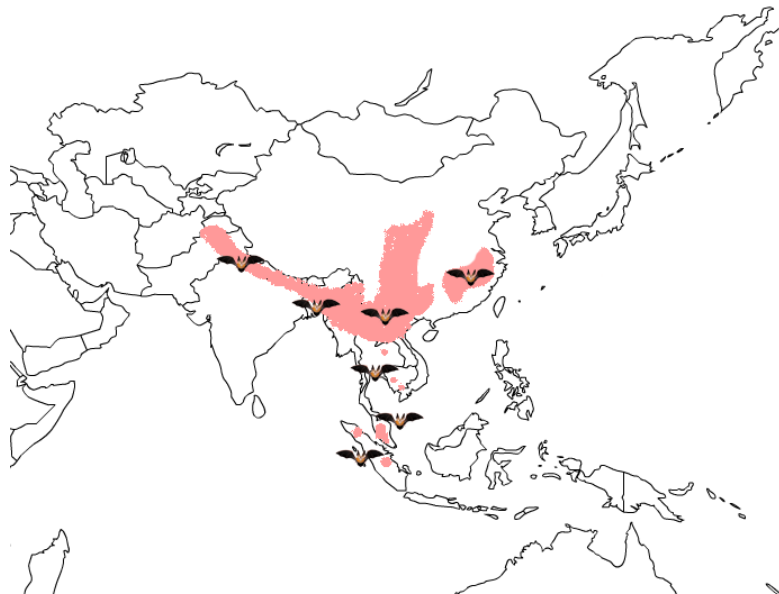

**SI Appendix, Fig. S2. The distribution of *Rhinolophus macrotis*.** *Rhinolophus macrotis*

mainly distribute in Southeast Asia, such as southern China, Bangladesh, India, Indonesia (Sumatra), Lao People's Democratic Republic, Malaysia (Peninsular Malaysia), Myanmar, Nepal, Pakistan, Thailand, Vietnam, Philippines. This figure is generated based on the findings from Vuong Tan Tu, et al. 2017 J Zool Syst Evol Res. (55) 177-198. doi.org/10.1111/jzs.12169

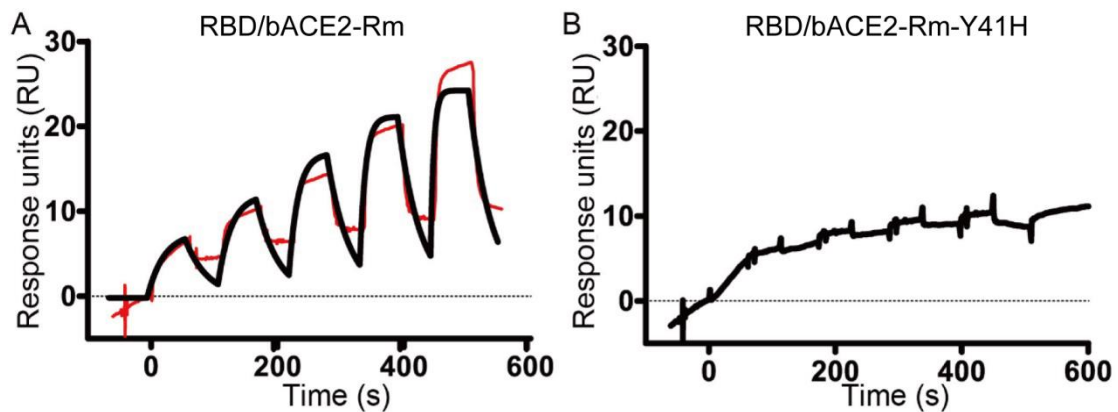

**SI Appendix, Fig. S3. SPR analysis of the binding between bACE2-Rm-Y41H mutant and bACE2-Rm-wt.** SPR assay characterisation of the binding of wild type bACE2-Rm-wt (A) or bACE2-Rm-Y41H mutant with SARS-COV-2 virus RBD. No substantial binding was observed with bACE2-Rm-Y41H mutant. The fits of the binding curves are shown in red.

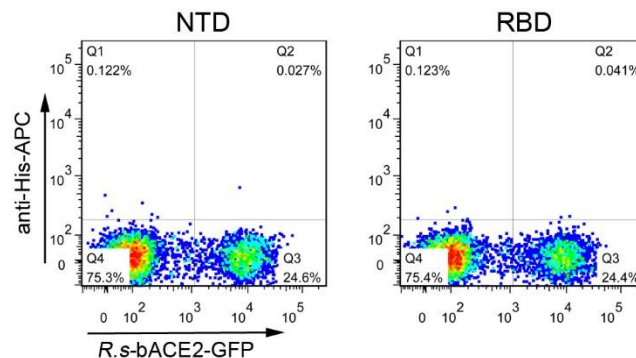

**SI Appendix, Fig. S4. Flow cytometry based assay characterizing the binding of the SARS-CoV-2 RBD with the bACE2 from *Rhinolophus sinicus* (R.s-bACE2).**

**SI Appendix, Table. S1. Binding profiles of SARS-CoV-2-RBD and SARS-CoV-RBD**

**binding to different ACE2s**

| Interaction pairs                 | Ka <sup>1</sup> (1/Ms) | Kd <sup>2</sup> (1/s) | KD(M)                 |
|-----------------------------------|------------------------|-----------------------|-----------------------|
| SARS-COV-2-RBD/bACE2-Rm-E.coli    | 1.02×10 <sup>5</sup>   | 1.32×10 <sup>-1</sup> | 1.30×10 <sup>-6</sup> |
| SARS-COV-2-RBD/bACE2-Rm-insect    | 4.61×10 <sup>4</sup>   | 6.92×10 <sup>-2</sup> | 1.50×10 <sup>-6</sup> |
| SARS-COV-2-RBD/bACE2-Rm-293T cell | 4.93×10 <sup>5</sup>   | 1.37×10 <sup>-1</sup> | 2.78×10 <sup>-6</sup> |
| SARS-CoV-RBD/bACE2-Ra             | -                      | -                     | -                     |
| SARS-COV-2-RBD/hACE2              | 2.93×10 <sup>5</sup>   | 5.97×10 <sup>-1</sup> | 2.04×10 <sup>-8</sup> |

<sup>1</sup> ka, association rate constant.

<sup>2</sup> kd, dissociation rate constant.

**SI Appendix, Table. S2. Crystallographic data collection and refinement statistics**

|                                                     | bACE2-Rm/SARS-CoV-2-RBD |
|-----------------------------------------------------|-------------------------|
| <b>Data collection</b>                              |                         |
| Space group                                         | I422                    |
| Wavelength (Å)                                      | 0.97853                 |
| Unit cell dimensions                                |                         |
| a, b, c (Å)                                         | 163.20, 163.20, 211.67  |
| α, β, γ (°)                                         | 90, 90, 90              |
| Resolution (Å)                                      | 50-3.2 (3.31-3.20)*     |
| Unique reflections                                  | 24258 (2387)            |
| <i>R</i> <sub>merge</sub>                           | 0.163/1.790             |
| <i>I</i> / <i>σ</i>                                 | 6 (4.3)                 |
| Completeness (%)                                    | 99.9 (100)              |
| Redundancy                                          | 13.4 (13.5)             |
| <b>Refinement</b>                                   |                         |
| Resolution (Å)                                      | 48.1-3.184              |
| <i>R</i> <sub>work</sub> / <i>R</i> <sub>free</sub> | 0.2185/0.2708           |
| No. atoms                                           |                         |
| Protein                                             | 7316                    |
| Ligands                                             | 1                       |
| Water                                               | 0                       |
| <b>R.m.s. deviations</b>                            |                         |
| Bond lengths (Å)                                    | 0.002                   |
| Bond angles (°)                                     | 0.682                   |
| <b>Ramachandran plot</b>                            |                         |
| Favored (%)                                         | 99.11                   |
| Allowed (%)                                         | 0.89                    |

Outliers (%) 0.00

\*Values in parentheses are for highest-resolution shell.

### SI Appendix, Table. S3. Cryo-EM data collection, refinement and validation

#### statistics of bACE2

|                                                      | bACE2-Rm    |
|------------------------------------------------------|-------------|
| <b>Data collection and processing</b>                |             |
| Magnification                                        | 130K        |
| Voltage (kV)                                         | 300         |
| Electron exposure (e <sup>-</sup> / Å <sup>2</sup> ) | 50          |
| Defocus range (μm)                                   | -1.8 ~ -2.2 |
| Pixel size (Å)                                       | 0.99375     |
| Symmetry imposed                                     | C1          |
| Final particle images (no.)                          | 62,289      |
| Map resolution (Å)                                   | 3.2         |
| FSC threshold                                        | 0.143       |
| <b>Refinement</b>                                    |             |
| Initial model used (PDB code)                        | 6LZG        |
| Model resolution range (Å)                           | up to 3.2   |
| FSC average (model to map)                           |             |
| Whole unit cell                                      | 0.7702      |
| Around atoms                                         | 0.7738      |
| <b>Model composition</b>                             |             |
| Non-hydrogen atoms                                   | 4853        |
| Protein residues                                     | 4852        |
| Ligands                                              | 1           |
| <b>B factors (Å<sup>2</sup>)</b>                     |             |
| Protein                                              | 70.0        |
| Ligand                                               | 76.5        |
| <b>R.m.s. deviations</b>                             |             |
| Bond lengths (Å)                                     | 0.002       |
| Bond angles (°)                                      | 0.418       |
| <b>Validation</b>                                    |             |
| MolProbity score                                     | 1.45        |
| Clashscore                                           | 4.88        |
| Poor rotamers (%)                                    | 0.00        |
| <b>Ramachandran plot</b>                             |             |
| Favored (%)                                          | 96.80       |
| Allowed (%)                                          | 3.20        |
| Outliers (%)                                         | 0.00        |

**SI Appendix, Table. S4. Comparison of SARS-CoV-2-RBD binding to hACE2 and bACE2-Rm**

| SARS-CoV-2-R |                                                                         |                                                                        |
|--------------|-------------------------------------------------------------------------|------------------------------------------------------------------------|
| BD           | humanACE2                                                               | bACE2-Rm                                                               |
| <b>K417</b>  | D30 (4, <u>1</u> )                                                      | D30 (6, <u>1</u> )                                                     |
| <b>G446</b>  | Q42 (4, <u>1</u> )                                                      | E42 (4)                                                                |
| <b>Y449</b>  | D38 (9, <u>1</u> ), Q42 (4, <u>1</u> )                                  | D38 (9, <u>1</u> ), E42 (8, <u>1</u> )                                 |
| <b>Y453</b>  | H34 (5, <u>1</u> )                                                      | S34 (3)                                                                |
| <b>L455</b>  | D30 (2), K31 (2), H34 (9)                                               | D30 (7), K31 (3), S34 (2)                                              |
| <b>F456</b>  | T27 (5), D30 (4), K31 (5)                                               | K27 (11), D30 (4), K31 (4)                                             |
| <b>Y473</b>  | T27 (1)                                                                 | K27 (6, <u>1</u> )                                                     |
| <b>A475</b>  | S19 (3, <u>1</u> ), Q24 (4),T27 (2)                                     | E24 (8, <u>1</u> ), K27 (2)                                            |
| <b>G476</b>  | S19 (4), Q24 (5)                                                        | E24 (9)                                                                |
| <b>E484</b>  | K31 (1)                                                                 | K31 (2, <u>1</u> )                                                     |
| <b>F486</b>  | L79 (2), M82 (9), Y83 (11)                                              | L79 (2), N82 (7), Y83 (8)                                              |
| <b>N487</b>  | Q24 (15, <u>1</u> ), Y83 (8, <u>1</u> )                                 | E24 (16, <u>1</u> ), Y83 (5, <u>1</u> )                                |
| <b>Y489</b>  | T27 (7), F28 (7), K31 (6), Y83 (1)                                      | K31 (9), F28 (10), Y83 (1, <u>1</u> ), K27 (4),<br>E24 (1)             |
| <b>F490</b>  | K31 (2)                                                                 | K31(3)                                                                 |
| <b>L492</b>  |                                                                         |                                                                        |
| <b>Q493</b>  | K31 (3), H34 (6), E35 (8)                                               | K31 (7), S34 (6), K35 (3)                                              |
| <b>G496</b>  | D38 (5), K353 (7, <u>1</u> )                                            | D38 (4), K353 (6, <u>1</u> )                                           |
| <b>Q498</b>  | D38 (1), Y41 (8), Q42 (8, <u>3</u> ), L45 (3)                           | Y41 (7), D38 (4), E42(3), K353 (2)                                     |
| <b>P499</b>  |                                                                         | K330 (1)                                                               |
| <b>T500</b>  | Y41 (7, <u>1</u> ), L45 (1), N330 (8),<br>D355 (8, <u>1</u> ), R357 (3) | K330 (11, <u>1</u> ), Y41 (10, <u>1</u> ), L45 (3), D355 (9), R357 (3) |
| <b>N501</b>  | Y41 (8, <u>1</u> ), K353 (11)                                           | Y41 (14, <u>1</u> ), K330 (1), K353 (11)                               |
| <b>G502</b>  | K353 (4, <u>1</u> ), G354 (7), D355 (1)                                 | K353 (6, <u>1</u> ), G354 (6), D355 (1)                                |
| <b>Y505</b>  | E37 (7), K353 (28), G354 (4),<br>R393 (1)                               | K353 (27), E37 (8, <u>1</u> ), R393 (2), G354 (2)                      |
| <b>Total</b> | 288, 16                                                                 | 311,14                                                                 |

The numbers in parentheses of hACE2 and bACE2-Rm residues represent the number of vdW contacts between the indicated residues with SARS-CoV-2-RBD. The numbers with underline suggest numbers of potential H-bonds between the pairs of residues. vdW contact was analyzed at a cutoff of 4.5 Å and H-bonds at a cutoff of 3.5 Å.

**SI Appendix, Table. S5. Conservation analysis of the residues involved in ACE2 binding to SARS-CoV-2-RBD among 31 bats**

|                                     | 24 | 27 | 28 | 30 | 31 | 34 | 35 | 37 | 38 | 41 | 42 | 45 | 79 | 82 | 83 | 330 | 353 | 354 | 355 | 357 | 393 | Substitutions |
|-------------------------------------|----|----|----|----|----|----|----|----|----|----|----|----|----|----|----|-----|-----|-----|-----|-----|-----|---------------|
| ADN93471 Rhinolophus_macroctis      | E  | K  | F  | D  | K  | S  | K  | E  | D  | Y  | E  | L  | L  | N  | Y  | K   | K   | G   | D   | R   | R   |               |
| QMQ39222.1 Rhinolophus_affinis      | R  | I  | F  | D  | N  | R  | E  | E  | E  | Y  | Q  | L  | L  | N  | Y  | N   | K   | G   | D   | R   | R   | 7             |
| XP_023609439 Myotis_lucifugus       | K  | I  | F  | E  | N  | S  | K  | E  | D  | H  | E  | L  | L  | T  | Y  | N   | K   | G   | D   | R   | R   | 7             |
| ADJ19219 Rousettus_leschenaultii    | L  | T  | F  | E  | K  | T  | E  | E  | D  | Y  | Q  | L  | L  | T  | Y  | K   | K   | G   | D   | R   | R   | 7             |
| BAH02663 Rhinolophus_ferrumequinum  | L  | K  | F  | D  | D  | S  | E  | E  | N  | H  | Q  | L  | L  | N  | F  | N   | K   | G   | D   | R   | R   | 8             |
| ADN93472 Rhinolophus_sinicus        | E  | I  | F  | D  | K  | T  | K  | E  | D  | H  | Q  | L  | L  | N  | Y  | N   | K   | G   | D   | R   | R   | 5             |
| ADN93477 Rhinolophus_pusillus       | K  | K  | F  | N  | D  | S  | E  | E  | D  | Y  | Q  | L  | L  | N  | Y  | N   | K   | G   | D   | R   | R   | 6             |
| ACM45790 Rhinolophus_ferrumequinum  | L  | T  | F  | E  | K  | T  | E  | E  | D  | Y  | Q  | L  | L  | T  | Y  | K   | K   | G   | D   | R   | R   | 7             |
| BAF50705 Rousettus_leschenaultii    | L  | T  | F  | E  | K  | T  | E  | E  | D  | Y  | Q  | L  | L  | T  | Y  | K   | K   | G   | D   | R   | R   | 7             |
| XP_015974412 Rousettus_aegyptiacus  | L  | T  | F  | E  | K  | T  | E  | E  | D  | Y  | Q  | L  | L  | T  | Y  | K   | K   | G   | D   | R   | R   | 7             |
| XP_011361275 Pteropus_vampyrus      | L  | T  | F  | E  | K  | T  | E  | E  | D  | Y  | Q  | L  | L  | A  | Y  | K   | K   | G   | D   | R   | K   | 7             |
| XP_006911709 Pteropus_alecto        | L  | T  | F  | E  | K  | T  | E  | E  | D  | Y  | Q  | L  | L  | A  | Y  | K   | K   | G   | D   | R   | K   | 7             |
| XP_019522936 Hipposideros_armiger   | L  | E  | F  | D  | K  | T  | E  | E  | D  | H  | L  | L  | R  | D  | Y  | N   | K   | G   | D   | R   | R   | 8             |
| ADN93470 Rhinolophus_ferrumequinum  | L  | K  | F  | D  | D  | S  | E  | E  | N  | H  | Q  | L  | L  | N  | F  | N   | K   | G   | D   | R   | R   | 8             |
| ALJ94034 Rhinolophus_landeri        | L  | T  | F  | D  | D  | S  | A  | E  | N  | Y  | Q  | L  | H  | N  | F  | N   | K   | G   | D   | R   | R   | 9             |
| ALJ94035 Rhinolophus_alcyone        | L  | I  | F  | D  | N  | S  | E  | E  | N  | H  | Q  | L  | H  | N  | F  | N   | K   | G   | D   | R   | R   | 10            |
| ABU54053 Rhinolophus_pearsonii      | R  | T  | F  | D  | K  | H  | E  | E  | D  | H  | Q  | L  | L  | D  | Y  | N   | K   | D   | D   | R   | R   | 9             |
| ACT66275 Rhinolophus_sinicus        | L  | I  | F  | D  | E  | S  | E  | E  | N  | Y  | Q  | L  | L  | N  | Y  | N   | K   | G   | D   | R   | R   | 7             |
| ADN93475 Rhinolophus_sinicus        | R  | T  | F  | D  | E  | S  | E  | E  | N  | Y  | Q  | L  | L  | N  | Y  | N   | K   | G   | D   | R   | R   | 7             |
| AGZ48803 Rhinolophus_sinicus        | E  | M  | F  | D  | K  | T  | K  | E  | D  | H  | Q  | L  | L  | N  | Y  | N   | K   | K   | D   | R   | R   | 6             |
| XP_028378317 Phyllostomus_discolor  | D  | K  | F  | E  | N  | N  | E  | E  | E  | Y  | Q  | L  | L  | N  | Y  | N   | K   | K   | D   | R   | R   | 9             |
| XP_024425698 Desmodus_rotundus      | E  | T  | F  | E  | N  | T  | E  | E  | E  | Y  | Q  | L  | I  | T  | Y  | N   | N   | G   | D   | R   | R   | 11            |
| XP_016058453 Miniopterus_natalensis | K  | K  | F  | E  | G  | S  | Q  | E  | D  | F  | E  | L  | L  | I  | Y  | N   | K   | N   | D   | R   | R   | 8             |
| ACT66266 Pipistrellus_abramus       | E  | R  | F  | V  | K  | H  | E  | E  | N  | H  | E  | L  | I  | G  | Y  | D   | K   | N   | D   | R   | R   | 10            |

|                               |   |   |   |   |   |   |   |   |   |   |   |   |   |   |   |   |   |   |   |   |   |    |
|-------------------------------|---|---|---|---|---|---|---|---|---|---|---|---|---|---|---|---|---|---|---|---|---|----|
| XP_027986092 Eptesicus_fuscus | N | I | F | E | N | S | E | E | D | H | E | L | L | T | F | N | K | N | D | R | R | 10 |
| XP_008153150 Eptesicus_fuscus | N | I | F | E | N | S | E | E | D | H | E | L | L | T | Y | N | K | G | D | R | R | 7  |
| XP_015426919 Myotis_davidii   | K | I | F | D | N | S | K | E | D | H | E | L | L | T | Y | N | K | G | D | R | R | 6  |
| XP_006775273 Myotis_davidii   | K | I | F | D | N | S | K | E | D | H | E | L | L | T | Y | N | K | G | D | R | R | 6  |
| XP_023609437 Myotis_lucifugus | K | I | F | E | N | S | K | E | D | H | E | L | L | T | Y | N | K | G | D | R | R | 7  |
| XP_014399783 Myotis_brandtii  | K | I | F | E | N | S | K | E | D | H | E | L | L | T | Y | N | K | G | D | R | R | 7  |
| XP_014399782 Myotis_brandtii  | K | I | F | E | N | S | K | E | D | H | E | L | L | T | Y | N | K | G | D | R | R | 7  |
| XP_014399780 Myotis_brandtii  | K | I | F | E | N | S | K | E | D | H | E | L | L | T | Y | N | K | G | D | R | R | 7  |

Red letters indicate the substitutions in the ACE2 of 31 bats.
